# Supplementary material for: Is Mass Transfer in Secondary Organic Aerosol Particles Intrinsically Slow? Equilibration Timescales of Engine Exhaust and α-Pinene SOA Under Dry and Humid Conditions
Source: Copernicus journal article supplement (doi:10.5194/acp-2018-215), 2018-03-13
Supplement: Supplementary file 1 [file acp-2018-215-supplement.pdf]

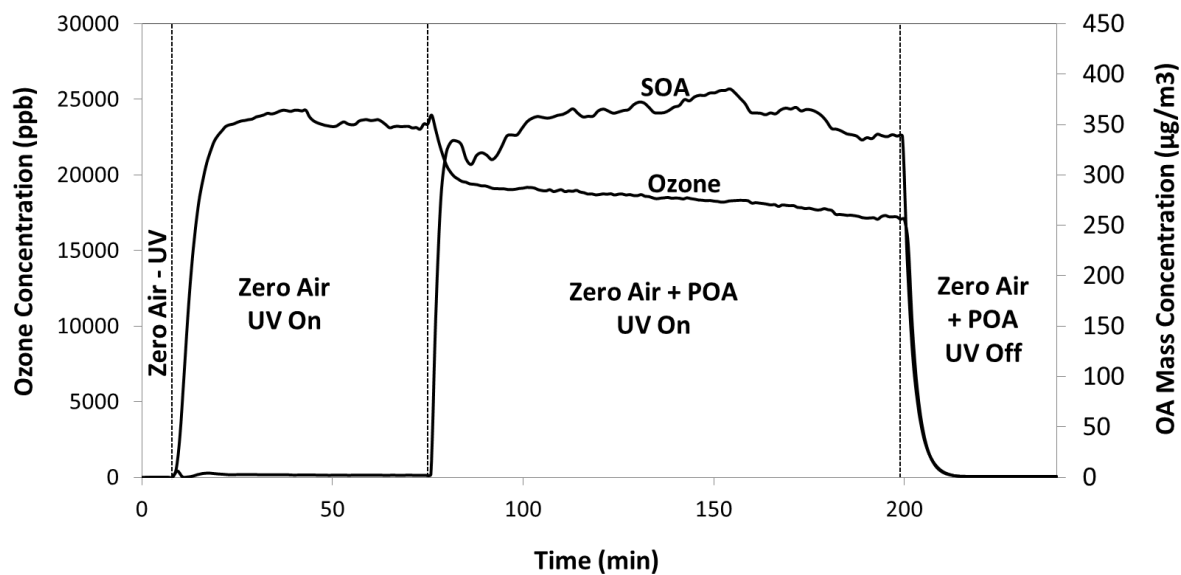

Figure S1. OA Mass concentration and Ozone concentration evolution during SOA production during preliminary measurements.
